# Supplementary material for: Morphological features and water solubility of iron in aged fine aerosol particles over the Indian Ocean
Source: Copernicus journal article supplement (doi:10.5194/egusphere-2023-389), 2023-03-22
Supplement: Supplementary file [file egusphere-2023-389-AC1-supplement.pdf]

*Reviewer #1 Comments:*

*This manuscript by Ueda et al., investigated the morphological features, mixing states and water solubility of Fe-containing particles in aged fine aerosol particles over the Indian Ocean. The topic of this study is attractive and interesting, which is very useful for understanding the ageing of particles and the dissolution of Fe-containing particles during the transport of aerosols and the morphology variations of Fe-containing particles. Overall, the manuscript is logical, and the main issues are very well discussed in this paper. I would therefore recommend this manuscript for publication after the authors have addressed the following comments.*

**Response:**

We appreciate the many constructive comments offered by Prof. Weijun Li, which have improved our manuscript considerably. Revisions have been highlighted as red in the text of the revised manuscript. This manuscript was checked according to the journal guidelines by a native-English speaking professional with experience in the review of technical documents in this field.

*Comments:*

*Major concerns:*

- 1. The units of horizontal variation of mass concentrations of (a) nss-SO<sub>4</sub><sup>2-</sup>, (b) NH<sub>4</sub><sup>+</sup>, and (c) Fe in PM<sub>2.5</sub> in Figure 2 are  $\mu\text{g}/\text{kg}$  and  $\text{ng}/\text{kg}$ , however, there are  $\mu\text{g}/\text{m}^3$  and  $\text{ng}/\text{m}^3$  in Table 2, which is confused for me, please explain the differences between the two units and make them uniform.*

**Response:**

Those mass concentrations were measured in units of  $\mu\text{g}/\text{m}^3$  and  $\text{ng}/\text{m}^3$ . For Figure 2, the Fe mass concentrations are shown as a mixing ratio ( $\mu\text{g}/\text{kg}$  and  $\text{ng}/\text{kg}$ ), which facilitates readers' comparison to model output data presented in Figure 8. Mixing ratios were calculated using the daily average of temperature and atmospheric pressure measured onboard. We added the explanation presented above to section 3.1. The units in the revised Tables 2 and 3 were changed to present units of  $\mu\text{g}/\text{kg}$  and  $\text{ng}/\text{kg}$  uniformly.

*Comments:*

- 2. Figure 2c (mass concentrations of Fe) has two more data points compared to figures 2a and 2b. Why?*

Response:

As explained in section 2.2, we measured ions (such as (a)  $\text{nss-SO}_4^{2-}$  and (b)  $\text{NH}_4^+$ ) using samples collected on a quartz fiber filter, and metals (such as Fe (c)) using samples collected on Teflon filter. Because stocks of quartz fiber filters were finished up, the sampling was stopped before that using a Teflon filter. We added some mention of each sampling period to section 2.2 of the revised manuscript.

Comments:

3. Line 232: *“For non-sea-salt components, the relations between the doubled nss-SO<sub>4</sub><sup>2-</sup> molar concentration and the NH<sub>4</sub><sup>+</sup> plus nss-K<sup>+</sup> molar concentration were usually between 1:1 and 2:1 (Fig. S1b), suggesting that nss-SO<sub>4</sub><sup>2-</sup> originated from ammonium sulfate, ammonium bisulfate, and ammonium potassium rather than from sulfuric acid.” Here, “ammonium potassium” should be “potassium sulfate” ?*

Response:

Thank you for noticing that mistake. That was corrected to potassium sulfate.

Comments:

4. Line 227-228 and line 232-233: *“The values nss-K<sup>+</sup>, which are regarded as originating mainly from biomass burning.....; For non-sea-salt components, the relations between the doubled nss-SO<sub>4</sub><sup>2-</sup> molar concentration and the NH<sub>4</sub><sup>+</sup> plus nss-K<sup>+</sup> molar concentration were usually between 1:1 and 2:1”. The author argued that nss-K<sup>+</sup> was mainly from biomass burning, please provide more evidence to support this view.*

Response:

As already described,  $\text{nss-K}^+$  has often been used as a tracer of biomass burning (Andreae, 1983; Kawamura and Kaplan, 1987; Narukawa et al., 1999). In addition, highly frequent agricultural burning around the windward area of our observation site in autumn was reported from some studies (Bray et al., 2019; Shaik et al., 2019). Therefore, we thought that the air mass of the north site in this study might have been affected by biomass burning around the windward continental area. However, we thought that the other possibilities should not be denied completely. We carefully revised the description with references as shown in the first paragraph in section 3.1.

Comments:

5. In the section: *“3.2 Individual particle features and co-existing states with Fe of sulfate and soot”,*

*the author chooses samples #01 and #07 as example to illustrate the individual particle features, however, I fail to get the idea why the author selects these two samples. Is there any special in these two samples, the reasons should be given.*

Response:

Because morphological features of samples #01-06 were similar, we used sample #01 as a representative example, and sample #07 as the other examples. Figures for photographs and morphological types of all samples are presented in supplemental materials (Figs.S3 and S4 before revision). In the revised manuscript, to show similarity of samples #01-06, the graph for morphological types was moved to Figure 3, with some revision of the first sentences in section 3.2.

Comments:

6. *Compared with the filed observation results, the CAM5-ATRAS model underestimates Fe by nearly 1/3 (from Figure 9a), why? Are there other unknown sources of Fe or is there a large uncertainty in the Fe emission inventory used by your model?*

Response:

As you have commented, a great amount of uncertainty exists in Fe emission inventories from all sources including anthropogenic materials, dust, and biomass burning origin. While greater underestimation of Fe exists in earlier model estimation, our model has improved Fe simulations with detailed representations of anthropogenic Fe (Matsui et al., 2018b) and new emission data of anthropogenic Fe by Rathod et al. (2020). Although with underestimation of nearly 1/3, our simulations have shown higher Fe concentrations and better agreement with observations than earlier estimates (Liu et al., 2022). The comparison to TEM results suggests that our model underestimates the fraction of anthropogenic aluminosilicate Fe, such as illite and kaolinite. Therefore, their emissions might be underestimated, leading to underestimation of total Fe mass concentrations. Additionally, different spatial and temporal scales between observations and models might also explain the model-observation differences in this study. These explanations were added to section 3.4.

Comments:

*Some other minor issues:*

1. *Line 132: Cl<sup>-</sup>, NO<sub>3</sub><sup>-</sup>, SO<sub>4</sub><sup>2-</sup>, Na<sup>+</sup>, NH<sup>+</sup>....., here, “Cl<sup>-</sup> and NH<sup>+</sup>” should be revised to “Cl<sup>-</sup> and NH<sub>4</sub><sup>+</sup>”. Please check the similar issues in whole text.*
2. *The numbers and letters are so small that they can't be read clearly in Figure 4 and Figure 7,*

*please adjust the font size.*

Response:

Thank you for pointing out the matters listed above. We rechecked and revised the manuscript.
